# Supplementary material
Source: PubMed Central journal article supplement (PMC3735951)
Supplement: supp_P036335_jlr.P036335-1.pdf [file supp_P036335_jlr.P036335-1.pdf]

**Supplemental Table 1. Mean of HDL-C (g/L) and apoA-I (g/L) according to quintiles of IF1 (mg/L) in controls.**

|        | Q1          | Q2          | Q3          | Q4          | Q5          |
|--------|-------------|-------------|-------------|-------------|-------------|
|        | <0.416      | 0.416-0.484 | 0.485-0.545 | 0.546-0.640 | ≥0.641      |
|        | n=132       | n=138       | n=130       | n=137       | n=136       |
| HDL-C  | 0.51 (0.11) | 0.53 (0.11) | 0.54 (0.11) | 0.58 (0.14) | 0.60 (0.13) |
| ApoA-1 | 1.42 (0.20) | 1.48 (0.22) | 1.52 (0.21) | 1.58 (0.26) | 1.59 (0.26) |
