# Supplementary material
Source: PubMed Central journal article supplement (PMC3735951)
Supplement: supp_P036335_jlr.P036335-2.pdf [file supp_P036335_jlr.P036335-2.pdf]

**Supplemental Table 2. Multiple linear regression analysis of IF1 on HDL-C and on apoA-I in the control group**

|                        | Regression of IF1 on HDL-C<br>R <sup>2</sup> =10.4% |       |       |      | Regression of IF1 on apoA-I<br>R <sup>2</sup> =12.3% |       |       |      |
|------------------------|-----------------------------------------------------|-------|-------|------|------------------------------------------------------|-------|-------|------|
|                        | β                                                   | se    | p     | %¥   | β                                                    | se    | p     | %¥   |
| HDL-C (g/L)            | 0.261                                               | 0.058 | 0.001 | 53.1 | -                                                    |       |       |      |
| ApoA-I (mg/L)          | -                                                   |       |       |      | 0.159                                                | 0.024 | 0.001 | 68.4 |
| Triglyceride (g/L)#    | -0.035                                              | 0.014 | 0.002 | 15.9 | -0.050                                               | 0.012 | 0.001 | 23.8 |
| ApoB (g/L)             | -0.072                                              | 0.027 | 0.01  | 18.0 | -0.062                                               | 0.027 | 0.03  | 7.8  |
| Alcohol (per 10 g/day) | 0.003                                               | 0.003 | 0.03  | 13.0 | -                                                    |       |       |      |

#log transformed data

¥percentage of variance explained
