# Supplementary material
Source: PubMed Central journal article supplement (PMC3735951)
Supplement: supp_P036335_jlr.P036335-3.pdf [file supp_P036335_jlr.P036335-3.pdf]

**Supplemental Table 3. IF1 according to treatments in cases and controls**

|                       | Cases       | Controls    | p for<br>treatment<br>effect | p for<br>case-control<br>effect |
|-----------------------|-------------|-------------|------------------------------|---------------------------------|
| <u>Treatment for:</u> |             |             |                              |                                 |
| Hypertension no       | 0.44 (0.14) | 0.53 (0.16) |                              |                                 |
| Hypertension yes      | 0.42 (0.12) | 0.54 (0.14) | 0.71                         | 0.001                           |
| Diabetes no           | 0.44 (0.13) | 0.53 (0.16) |                              |                                 |
| Diabetes yes          | 0.43 (0.11) | 0.54 (0.14) | 0.98                         | 0.001                           |
| Dyslipemia no         | 0.43 (0.13) | 0.53 (0.15) |                              |                                 |
| Dyslipemia yes        | 0.44 (0.12) | 0.52 (0.16) | 0.99                         | 0.001                           |
| Statin no             | 0.42 (0.13) | 0.53 (0.15) |                              |                                 |
| Statin yes            | 0.44 (0.12) | 0.53 (0.16) | 0.34                         | 0.001                           |
| Fibrate no            | 0.44 (0.13) | 0.53 (0.15) |                              |                                 |
| Fibrate yes           | 0.40 (0.13) | 0.51 (0.16) | 0.10                         | 0.001                           |
