# Supplementary material
Source: PubMed Central journal article supplement (PMC3735951)
Supplement: supp_P036335_jlr.P036335-4.pdf [file supp_P036335_jlr.P036335-4.pdf]

**Supplemental Table 4. Logistic regression model using classical cardiovascular risk factors; risk of coronary heart disease**

|                                                         | OR   | 95% CI    | p     |
|---------------------------------------------------------|------|-----------|-------|
| Smoking                                                 |      |           |       |
| Current <i>versus</i> never                             | 2.52 | 1.59-3.98 | 0.001 |
| Past <i>versus</i> never                                | 1.75 | 1.24-2.47 | 0.002 |
| Physical activity (high <i>versus</i> low level)        | 0.37 | 0.26-0.53 | 0.001 |
| Alcohol (per 10 g / day)                                | 1.03 | 0.98-1.10 | 0.15  |
| Treatment for diabetes                                  | 3.35 | 2.18-5.16 | 0.001 |
| Treatment for dyslipidaemia                             | 5.21 | 3.88-7.01 | 0.001 |
| Treatment for hypertension                              | 1.68 | 1.23-2.30 | 0.001 |
| CRP ( $\geq 5$ mg / L <i>versus</i> $< 5$ mg / L)       | 4.53 | 3.34-6.14 | 0.001 |
| Lp(a) ( $\geq 0.30$ g / L <i>versus</i> $< 0.30$ g / L) | 2.13 | 1.60-2.84 | 0.001 |
| Triglycerides (g / L) <sup>#</sup>                      | 2.56 | 1.90-3.46 | 0.001 |

*#log transformed data*

*OR 95% CI: odds ratio and 95% confidence interval*

*Physical activity: "high" physical activity during 20 mn at least twice a week versus "low" once a week or less*
