# Supplementary material
Source: PubMed Central journal article supplement (PMC3735951)
Supplement: supp_P036335_jlr.P036335-5.pdf [file supp_P036335_jlr.P036335-5.pdf]

**Supplemental Table 5. Risk of coronary hearth disease using HDL-C, apoA-I and IF1 as explanatory variables, after patients having presented an acute event in the last three months were excluded**

| Models with | Q1 | Q2<br>OR (95% CI) | Q3<br>OR (95% CI) | Q4<br>OR (95% CI) | p for trend |
|-------------|----|-------------------|-------------------|-------------------|-------------|
| HDL-C       | 1  | 0.33 (0.19-0.56)  | 0.13 (0.07-0.24)  | 0.12 (0.06-0.22)  | 0.001       |
| ApoA-I      | 1  | 0.18 (0.10-0.33)  | 0.09 (0.05-0.16)  | 0.04 (0.02-0.09)  | 0.001       |
| IF1         | 1  | 0.65 (0.40-1.07)  | 0.34 (0.20-0.56)  | 0.18 (0.11-0.31)  | 0.001       |
| IF1#        | 1  | 0.78 (0.46-1.32)  | 0.46 (0.27-0.79)  | 0.27 (0.15-0.48)  | 0.001       |
| IF1¥        | 1  | 0.84 (0.49-1.43)  | 0.61 (0.35-1.08)  | 0.36 (0.20-0.65)  | 0.001       |

*Quartiles for HDL-C: 0.36, 0.43, 0.51 g/L*

*Quartiles for apoA-I: 1.19, 1.37, 1.55 g/L*

*Quartiles for IF1: 0.382, 0.466, 0.560 mg/L*

*All models adjusted on treatments for dyslipidaemia, hypertension and diabetes, smoking, physical activity, alcohol consumption, CRP, Lp(a) and triglycerides*

*OR (95%CI): Odd Ratio (95% confidence interval).*

*# plus HDL-C*

*¥ plus apoA-I*
