# Supplementary material
Source: PubMed Central journal article supplement (PMC3735951)
Supplement: supp_P036335_jlr.P036335-6.pdf [file supp_P036335_jlr.P036335-6.pdf]

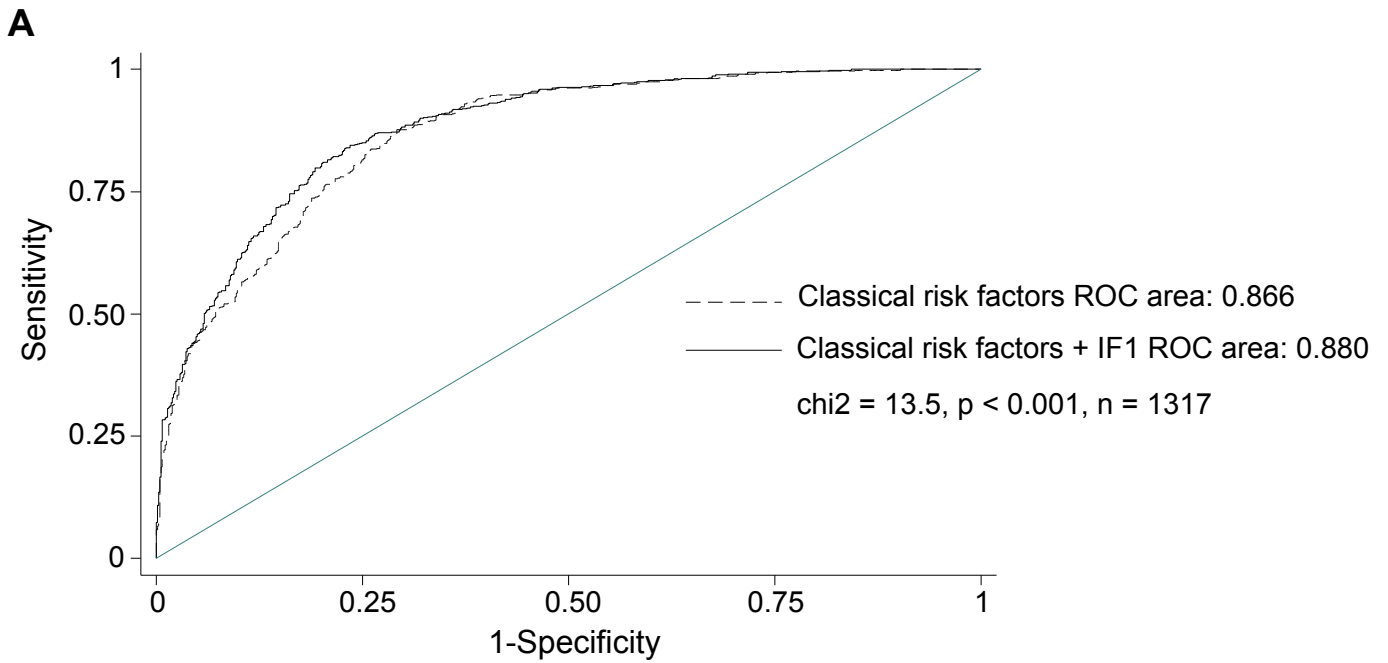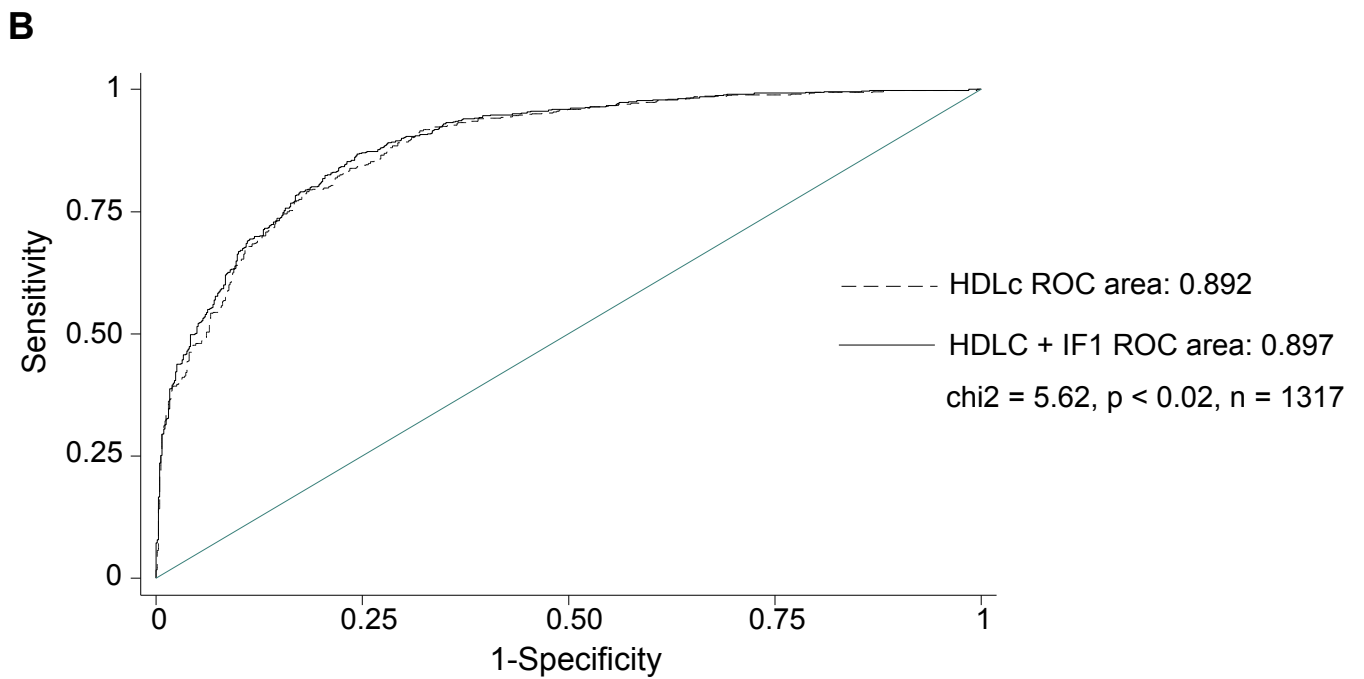

**Supplemental Figure 1: Receiver operator characteristic (ROC) curves for predicting CAD risk.**

ROC curves were constructed using classical risk factors  $\pm$  IF1 (A), HDL-C  $\pm$  IF1, after adjustment for classical risk factors (B). Classical risk factors were smoking, physical activity, alcohol consumption, CRP, Lp(a), TG, and treatment for dyslipidemia, hypertension and diabetes.

The diagonal line indicates a test with an area under the ROC curve of 0.5.
